# Supplementary material
Source: HighWire-hosted journal article supplement (https://bjsm.bmj.com/content/55/20/1170)
Supplement: inline-supplementary-material-1 [file inline-supplementary-material-1.pdf]

## Supplementary Tables

**Supplementary Table 1.** Search Strategy for MEDLINE, EMBASE, CENTRAL, PEDro, CINAHL and SPORTDiscus databases, January 14<sup>th</sup>, 2021.

---

### MEDLINE, EMBASE and CENTRAL

1. (football\* or soccer).mp.
2. FOOTBALL/
3. soccer/
4. 1 or 2 or 3
5. (prevent\* or protect\* or risk\* or reduc\* or avoid\* or prehab\* or reccuren\*).mp.
6. randomized controlled trial.pt.
7. controlled clinical trial.pt.
8. randomized.ab.
9. placebo.ab,ti.
10. randomly.ab,ti.
11. trial.ab,ti.
12. groups.ab,ti.
13. 6 or 7 or 8 or 9 or 10 or 11 or 12
14. (animals not (humans and animals)).sh.
15. 13 not 14
16. 4 and 5 and 15

---

### PEDro

Abstract & Title: Soccer

Method: Clinical trial

Abstract & Title: Football

Method: Clinical trial

---

### CINAHL

- S1. football\* or soccer
  - S2. (MH "Football") OR (MH "Football Injuries")
  - S3. (MH "Soccer") OR (MH "Soccer Injuries")
  - S4. S1 OR S2 OR S3
  - S5. prevent\* or protect\* or risk\* or reduc\* or avoid\* or prehab\* or reccuren\*
  - S6. (MH "Randomized Controlled Trials+") OR (MH "Clinical Trials+")
  - S7. (MH "Random Assignment")
  - S8. (MH "Placebo Effect") OR (MH "Placebos")
-

---

S9. (MH "Intervention Trials") OR (MH "Preventive Trials")

S10. (MH "Control Group") OR (MH "Group Exercise")

S11. S6 OR S7 OR S8 OR S9 OR S10

S12. (MH "Animals+")

S13. S11 not S12

S14. S4 AND S5 AND S13

---

SPORTDiscus

S1. soccer

S2. football

S3. S1 OR S2

S4. prevent\* or protect\* or risk\* or reduc\* or avoid\* or prehab\* or reccuren\*

S5. randomized controlled trials

S6. controlled clinical trial

S7. randomized

S8. placebo

S9. randomly

S10. trial

S11. group

S12. S5 OR S6 OR S7 OR S8 OR S9 OR S10 OR S11

S13. animals

S14. S12 not S13

S15. S3 AND S4 AND S14

---

**Supplementary Table 2.** Characteristics of registered trials.

| Database (number)                 | Year of registration / Status | Country      | Participants (all football players) | Sample size | Intervention                                                                                                                                                                                                                                                                                                                                                                                                | Study length | Outcome                                                                    |
|-----------------------------------|-------------------------------|--------------|-------------------------------------|-------------|-------------------------------------------------------------------------------------------------------------------------------------------------------------------------------------------------------------------------------------------------------------------------------------------------------------------------------------------------------------------------------------------------------------|--------------|----------------------------------------------------------------------------|
| ClinicalTrials.gov<br>NCT04674072 | 2020 / Not yet recruiting     | Saudi Arabia | Male (18 to 40 years)               | 400         | IG: The intervention group will be instructed to include the reverse Nordic curl exercise into their warm-up 15 to 20 mins before training session (3 times per week) during one season (6 months).<br><br>CG: The control group will practice their usual warm up. Usual warm-up is defined as any basic exercises performed before a performance or practice to prepare the muscles for vigorous actions. | 6 months     | Incidence of initial injuries.<br><br>The incidence of recurrent injuries. |
| ClinicalTrials.gov<br>NCT04673903 | 2020 / Not yet recruiting     | Saudi Arabia | Male (18 to 40 years)               | 400         | IG: Copenhagen adduction exercise to be included into the warm up before training session (3 times per week) during one season (6 months).<br><br>CG: The control group will practice their usual warm up (defined as any basic exercises performed before a performance or practice to prepare the muscles for vigorous actions).                                                                          | 6 months     | Incidence of initial injuries.<br><br>The incidence of recurrent injuries. |

|                                   |                           |        |                                                     |                  |                                                                                                                                                                                                                                                                                                                                                                                                                                                                                 |          |                                                                                                  |
|-----------------------------------|---------------------------|--------|-----------------------------------------------------|------------------|---------------------------------------------------------------------------------------------------------------------------------------------------------------------------------------------------------------------------------------------------------------------------------------------------------------------------------------------------------------------------------------------------------------------------------------------------------------------------------|----------|--------------------------------------------------------------------------------------------------|
| ClinicalTrials.gov<br>NCT04272047 | 2020 / Not yet recruiting | Sweden | Male and female, youth and adult ( $\geq 14$ years) | 750 participants | <p>IG-1: Knee Control+ program, 15-20 minute training program to be performed at all team training sessions during the season.</p> <p>IG-2: Adductor strengthening program to be performed 2-3 times per week, one set per side, during the pre-season, and 1 time per week, one set per side during the in-season.</p> <p>CG: Knee Control program, 15-20 minute training program to be performed as per the team's usual routines (no intervention from the researchers).</p> | 7 months | All physical complaints injury in four main locations (i.e., ankle, knee, hamstrings, hip/groin) |
|-----------------------------------|---------------------------|--------|-----------------------------------------------------|------------------|---------------------------------------------------------------------------------------------------------------------------------------------------------------------------------------------------------------------------------------------------------------------------------------------------------------------------------------------------------------------------------------------------------------------------------------------------------------------------------|----------|--------------------------------------------------------------------------------------------------|

IG: Intervention Group; IG-1: Intervention Group 1; IG-2: Intervention group 2; CG: Control group.

Data search strategy for ClinicalTrials.gov: soccer OR football AND injury AND prevention.

Data search strategy for International Standard Randomized Controlled Trial Number Register [IRISCTN]: soccer OR football.

Data search strategy for Australian-New Zealand Clinical Trials Registry [ANZCTR]: soccer OR football.

Data search strategy for Registro Brasileiro de Ensaios Clínicos [ReBec]: "futebol", soccer, football.

**Supplementary Table 3.** Risk of bias of included studies (PEDro scale).

| Study                  | Eligibility criteria specified | Random allocation | Concealed allocation | Groups similar at baseline | Participant blinding | Therapist blinding | Assessor blinding | Adequate follow-up | Intention to treat analysis | Between group comparisons | Point estimates and variability |
|------------------------|--------------------------------|-------------------|----------------------|----------------------------|----------------------|--------------------|-------------------|--------------------|-----------------------------|---------------------------|---------------------------------|
| Gilchrist, 2008        | Yes                            | Yes               | No                   | Yes                        | No                   | No                 | No                | No                 | No                          | Yes                       | Yes                             |
| Hammes, 2015           | Yes                            | Yes               | No                   | No                         | No                   | No                 | No                | Yes                | No                          | Yes                       | Yes                             |
| Hasebe, 2020           | No                             | Yes               | Yes                  | No                         | No                   | No                 | Yes               | Yes                | Yes                         | Yes                       | Yes                             |
| Owoeye, 2014           | No                             | Yes               | No                   | Yes                        | No                   | No                 | No                | Yes                | Yes                         | Yes                       | Yes                             |
| Silvers-Granelli, 2017 | Yes                            | Yes               | No                   | No                         | No                   | No                 | No                | Yes                | No                          | Yes                       | Yes                             |
| Soligard, 2008         | Yes                            | Yes               | No                   | No                         | No                   | No                 | Yes               | No                 | Yes                         | Yes                       | Yes                             |
| Steffen, 2008          | Yes                            | Yes               | Yes                  | No                         | No                   | No                 | Yes               | Yes                | Yes                         | Yes                       | Yes                             |
| van de Hoef, 2018      | Yes                            | Yes               | No                   | No                         | No                   | No                 | No                | No                 | Yes                         | Yes                       | Yes                             |
| van der Horst, 2015    | Yes                            | Yes               | No                   | Yes                        | No                   | No                 | No                | No                 | Yes                         | Yes                       | Yes                             |
| Waldén, 2012           | Yes                            | Yes               | Yes                  | Yes                        | No                   | No                 | Yes               | No                 | Yes                         | Yes                       | Yes                             |
